# Supplementary material
Source: PubMed Central journal article supplement (PMC9743253)
Supplement: EIJ-D-22-00735_Metha_SD.pdf [file EIJ-D-22-00735_Metha_SD.pdf]

## **Supplementary data**

### **Supplementary Appendix 1. Study Committees.**

#### **Steering Committee:**

Shamir Mehta (Principal Investigator, Chair), McMaster University, Hamilton Health Sciences, Population Health Research Institute, Hamilton, ON, Canada

Eva Lonn, McMaster University, Hamilton Health Sciences, Population Health Research Institute, Hamilton, ON, Canada

Guillaume Pare, McMaster University, Hamilton Health Sciences, Population Health Research Institute, Hamilton, ON, Canada

Matthew McQueen, McMaster University, Hamilton Health Sciences, Population Health Research Institute, Hamilton, ON, Canada

#### **Data Safety Monitoring Committee:**

Shaun Goodman (Chair), University of Toronto, St. Michael's Hospital, Toronto, ON, Canada, and University of Alberta, Edmonton, AB, Canada

Todd Anderson, University of Calgary, Calgary, AB, Canada

Jacques Genest, McGill University, Montreal, QC, Canada

## Supplementary Appendix 2. Methods: pre-analytical and analytical process.

Specimens were collected, transported to the central lab (CRLB-GMEL), and processed within 2 hours of collection. After processing, samples were stored in liquid nitrogen vapor (-165°C) until analysis.

Prior to analysis, specimens underwent controlled thaw and vortexing. Samples were analyzed within 1 hour of thaw, or placed in the refrigerator.

**Supplementary Table 1. Analytical methods.**

| Analyte     | Manufacturer    | Instrument     | Method                                                           |
|-------------|-----------------|----------------|------------------------------------------------------------------|
| Direct LDL  | Beckman Coulter | Unicel DxC 600 | Automated colorimetric timed-endpoint                            |
| Cholesterol | Beckman Coulter | Unicel DxC 600 | Automated colorimetric timed-endpoint                            |
| HDL         | Beckman Coulter | Unicel DxC 600 | Automated colorimetric timed-endpoint                            |
| Trig        | Beckman Coulter | Unicel DxC 600 | Automated colorimetric timed-endpoint (glycerophosphate oxidase) |
| ApoB        | Beckman Coulter | Unicel DxC 600 | Automated turbidimetric (antibody/antigen complex)               |
| Lp(a)       | Roche/Randox    | Cobas 6000     | Automated immunoturbidimetric                                    |
| CRP         | Beckman Coulter | Unicel DxC 600 | Automated turbidimetric (antibody/antigen complex)               |
| CKMB        | Roche           | Cobas 8000     | Automated ECLIA (electrochemiluminescence immunoassay)           |

### Direct LDL

The method depends on a unique detergent which solubilizes only the non-LDL lipoprotein particles and releases cholesterol to react with cholesterol esterase and cholesterol oxidase to produce a non-colour forming reaction. A second detergent solubilizes the remaining LDL particles, and a chromogenic coupler allows for colour formation.

LDLD reagent is used to measure the cholesterol concentration by a timed-endpoint method. The Beckman Coulter Synchron System(s) automatically proportions the appropriate LDL cholesterol sample and reagent volumes into a cuvette. The ratio used is one part sample to 93 parts reagent. The System monitors the change in absorbance at 560 nanometers. This change in absorbance is directly proportional to the concentration of LDL cholesterol in the samples and is used by the System to calculate the express the LDL cholesterol concentration.

**Supplementary Table 2. Baseline characteristics (included vs excluded).**

|                                                       | <b>Included</b>  | <b>Excluded</b>  |                |
|-------------------------------------------------------|------------------|------------------|----------------|
|                                                       | <b>Mean (SD)</b> | <b>Mean (SD)</b> | <b>p-value</b> |
|                                                       | N=68             | N=29             |                |
| Age (yrs)                                             | 62.37 (10.74)    | 65.48 (14.14)    | 0.24           |
| BMI                                                   | 28.98 (5.60)     | 28.29 (5.42)     | 0.59           |
| Systolic blood pressure (mm/Hg)                       | 144.1 (23.79)    | 148.9 (23.47)    | 0.36           |
| Diastolic blood pressure (mm/Hg)                      | 89.22 (15.80)    | 87.31 (16.21)    | 0.59           |
| Heart rate (bpm)                                      | 88.84 (23.89)    | 88.17 (29.92)    | 0.91           |
| Male                                                  | 55 (80.88)       | 20 (68.97)       | 0.29           |
| White                                                 | 61 (89.71)       | 26 (89.66)       | 1.00           |
| Current smoker                                        | 23 (33.82)       | 14 (48.28)       | 0.18           |
| Medical history                                       |                  |                  |                |
| Previous MI                                           | 6 (8.82)         | 4 (13.79)        | 0.48           |
| Previous stroke                                       | 1 (1.47)         | 0 (0.00)         | 1.00           |
| Family history of early onset coronary artery disease | 7 (10.29)        | 3 (10.34)        | 0.99           |
| Atrial fibrillation/flutter                           | 2 (2.94)         | 0 (0.00)         | 0.35           |
| History of heart failure                              | 0 (0.00)         | 0 (0.00)         | ---            |
| Peripheral arterial disease                           | 1 (1.47)         | 1 (3.45)         | 0.53           |
| Hypertension                                          | 30 (44.12)       | 13 (44.83)       | 0.95           |
| Dyslipidemia                                          | 25 (36.76)       | 9 (31.03)        | 0.59           |
| Diabetes                                              | 6 (8.82)         | 4 (13.79)        | 0.46           |
| Chronic renal insufficiency                           | 0 (0.00)         | 0 (0.00)         | ---            |
| Other relevant ongoing medical condition              | 10 (14.71)       | 5 (17.24)        | 0.75           |
| Time from symptom onset to primary PCI                | 3.65 (2.25)      | 3.28 (2.07)      | 0.46           |
| Prior statin use                                      | 16 (23.53)       | 1 (3.45)         | 0.02           |

**Supplementary Table 3. Baseline measurements (included vs excluded).**

|                                        | <b>Included</b>   | <b>Excluded</b>   | <b>p-value</b> |
|----------------------------------------|-------------------|-------------------|----------------|
| N                                      | 68                | 29                | .              |
| LDL-cholesterol (mmol/L), mean(SD)     | 2.92 ( 1.01)      | 2.89 ( 1.10)      | 0.88           |
| ApoB (g/L), mean(SD)                   | 0.86 ( 0.30)      | 0.85 ( 0.31)      | 0.91           |
| Non HDL-cholesterol (mmol/L), mean(SD) | 3.58 ( 1.22)      | 3.46 ( 1.31)      | 0.67           |
| Total cholesterol (mmol/L), mean(SD)   | 4.63 ( 1.21)      | 4.58 ( 1.35)      | 0.87           |
| Triglycerides (mmol/L), median(IQR)    | 1.09 (0.63, 1.62) | 0.92 (0.60, 1.36) | 0.29           |
| HDL-cholesterol (mmol/L), mean(SD)     | 1.04 ( 0.28)      | 1.12 ( 0.28)      | 0.25           |
| Lp (a) (mg/L), median(IQR)             | 73 (34, 427)      | 158 (47, 447)     | 0.41           |

**Supplementary Table 4. LDL- and ApoB-adjusted analyses with gender.**

|                                           | Alirocumab<br>N=38 |              |                | Sham Control<br>N=30 |              |                | Between Group<br>Difference<br>(95% CI) | P      |
|-------------------------------------------|--------------------|--------------|----------------|----------------------|--------------|----------------|-----------------------------------------|--------|
|                                           | Baseline           | Follow-up    | Percent Change | Baseline             | Follow-up    | Percent Change |                                         |        |
| LDL-cholesterol<br>(mean [SD],<br>mmol/L) | 2.97 ( 1.09)       | 0.75 (0.46)  | -72.9% (17.5)  | 2.87(0.90)           | 1.30 (0.45)  | -48.1% (29.5)  | -23.7%<br>(-32.7, -14.7)                | <0.001 |
| ApoB<br>(mean [SD], g/L)                  | 0.88 ( 0.33)       | 0.40 ( 0.11) | -50.6(17.7)    | 0.83 ( 0.25)         | 0.49 ( 0.13) | -36.3 (24.4)   | -12.2 ( -18.7, -5.7)*                   | <0.001 |

\*68.4% of patients in the alirocumab group versus 26.7% in the sham control group had ApoB levels  $\leq$  the assay lower detection limit of 0.35 g/L (P=0.001). All of these patients were assigned a value of 0.35 g/L.

**Supplementary Table 5. Adverse events.**

| <b>Event</b>   | <b>Treatment Allocation</b> | <b>Summary</b>                                            |
|----------------|-----------------------------|-----------------------------------------------------------|
| Death          | Sham Control                | Death reported 11 days post 1st injection. Unknown cause. |
| Heart failure  | Alirocumab                  | Heart failure reported 2 days post 1st injection.         |
| Heart failure  | Alirocumab                  | Heart failure reported 2 hours post 1st injection.        |
| Heart failure  | Alirocumab                  | Heart failure reported 1 hour post 1st injection.         |
| Heart failure  | Alirocumab                  | Heart failure reported 2 days post 1st injection.         |
| Minor bleeding | Sham Control                | Minor bleeding reported 48 days post 3rd injection.       |

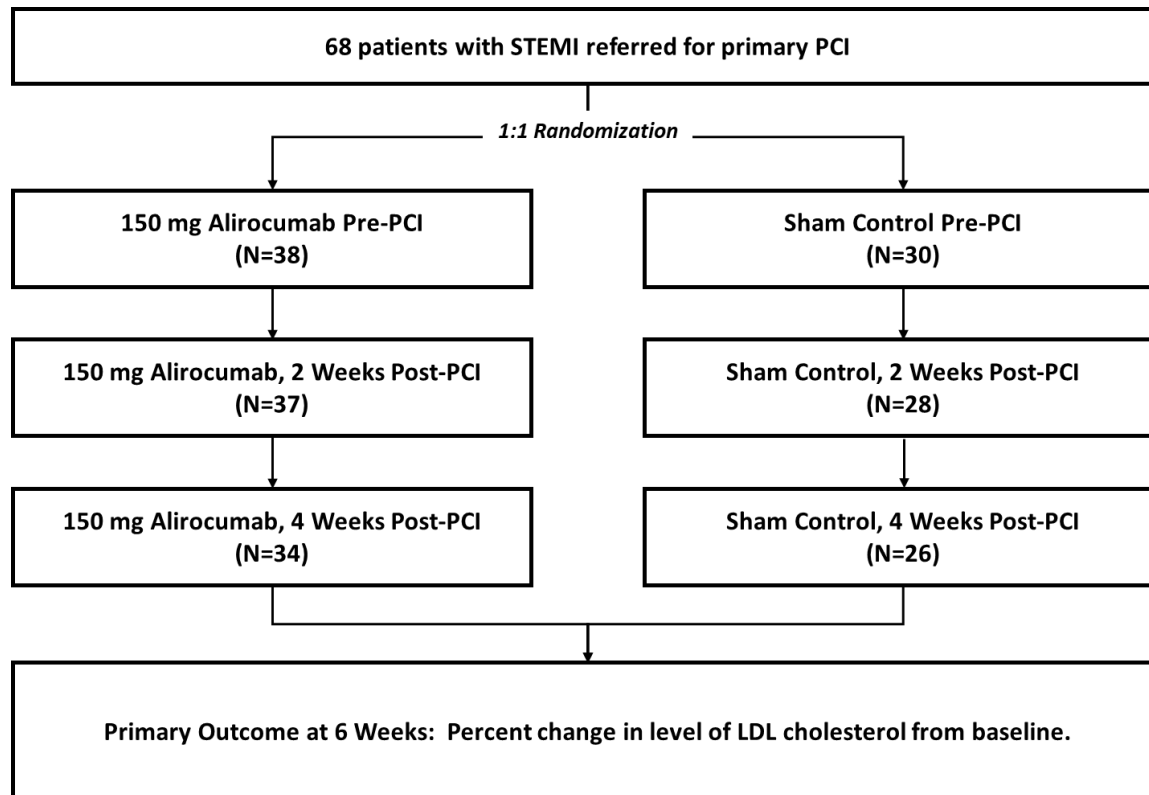

Supplementary Figure 1. Trial flow diagram.
